# Supplementary material for: CRISPR-Cas9 Dual-gRNA Attack Causes Mutation, Excision and Inversion of the HIV-1 Proviral DNA
Source: Viruses. 2020 Mar 18;12(3):330. doi: 10.3390/v12030330 (PMC7150824; doi:10.3390/v12030330)
Supplement: Supplementary file 1 [file viruses-12-00330-s001.pdf]

| a | gGag1 |                        |                   |        | gGag3             |                   |        |      |
|---|-------|------------------------|-------------------|--------|-------------------|-------------------|--------|------|
|   | #     | GTATAAAGAGACCATCA      | ATCAGGAAGCTGCAGAA |        | AGATGAGAGAACCAAGG | GGAAGTGACATAGCAGG |        |      |
|   | 1     | GTATAAAGAGACCATCA      | ATCAGGAAGCTGCAGAA | WT     | AGATGAGAGAACCAAGG | GGAAGTGACATAGCAGG | WT     |      |
|   | 2     | GCTAAAAGAGACCATCA      | ATCAGGAAGCTGCAGAA | WT     | AGATGAGAGTACCAAGG | --AAGTGACATAGCAGG | -2     |      |
|   | 3     | GTTAAAAGAGACCATC-      | ATCAGGAAGCTGCAGAA | -1     | AGATGAGAGAACCAAGG | GGAAGTGACATAGCAGG | WT     |      |
|   | 4     | GTTAAAAGAGACCATCA      | ATCAGGAAGCTGCAGAA | +1     | AGATGAGAGAACCAAGG | GGAAGTGACATAGCAGG | WT     |      |
|   | 5     | GTTAAAAGAGACCA--       | -TGAGGAAGCTGCAGAA | -4     | AGATGAGAGAACCAAGG | GGAAGTGACATAGCAGG | WT     |      |
|   | 6     | GTTAAAAGAG--           | --AAGCTGCAGAA     | -13    | AGATGAGAGAACCAAGG | GGAAGTGACATAGCAGG | WT     |      |
|   | 7     | GTTAAAAGAGACCATCA      | ATCAGGAAGCTGCAGAA | NS     | AGATGAGAGAACCAAGG | GGAAGTGACATAGCAGG | WT     |      |
|   | 8     | GTTAAAAGAGAGGA--       | --AGCTGCAGAA      | -10    | AGATGAGAGAACCAAGG | GGAAGTGACATAGCAGG | WT     |      |
|   | 9     | GTTAAAAGAGACCA--       | --GAGCAGAA        | -13/NS | AGATGAGAGAACCAAGG | --AAGTGACATAGCAGG | -1     |      |
|   | 10    | GTTAAAAGAG--           | --GAAGCTGCAGAA    | -12    | AGATGAGAGAACCAAGG | --AAGTGACATAGCAGG | -2     |      |
|   | 11    | GTTAAAAGAGACCATC-      | -TGAGGAAGCTGCAGAA | -2     | AGATGAGAGAACCAAGG | --GTGTGACATAGCAGG | -2/NS  |      |
|   | 12    | GTTAAAAGAGACCA--       | --GAG             | -17/NS | AGATGAGAGAACCAAGG | --GAGTGACATAGCAGG | -2/NS  |      |
|   | 13    | GTTAAAAGAGACCATC-      | --                |        | AGATGAGAGAACCAAGG | C--               | NS/-23 |      |
|   | 14    | GTTAAAAGAGACCTA--      | --CAGGAAGCTGCAGAA | NS/-4  |                   | --AGTGACATAGCAGG  | -24    |      |
|   | 15    | GTTAAAAGAGACCAAGCC     | ATCAGGAAGCTGCAGAA | NS/+1  | AGATGAGAG--       | --                | -44    |      |
|   | 16    | GTTAAA--               | --CAGGAAGCTGCAGAA | -13    |                   | GGAAGTGACATAGCAGG | -28    |      |
|   | 17    | GTTAAAAGAGACCATCA      | -TGAGGAAGCTGCAGAA | -1     | AGATGAGAGAACCAAGG | GGAAGTGACATAGCAGG | +1     |      |
|   | 18    | GTTAAAAGAGACCATC-      | --CAGGAAGCTGCAGAA | -3     | AGATGAGAGAACCAAGG | --AAGTGACATAGCAGG | -1     |      |
|   | 19    | GTTAAAAGAGACCATCA      |                   |        |                   | GGAAGTGACATAGCAGG | EX     |      |
|   | 20    | GTTAAAAGAGACCATCA      |                   |        |                   | GGAAGTGACATAGCAGG | EX     |      |
|   | 21    |                        |                   |        |                   |                   | EX     | -156 |
|   | 22    | GTTAAAAGAGACC--        |                   |        |                   | --AGCAGG          | EX     | -15  |
|   | 23    | GTTAAAAGAGGAGAGCTTAACA |                   |        |                   | GGAAGTGACATAGCAGG | EX     | +4   |

  

| b | gGag1 |                          |                   |        | gGag3             |                      |        |     |
|---|-------|--------------------------|-------------------|--------|-------------------|----------------------|--------|-----|
|   | #     | GTATAAAGAGACCATCA        | ATCAGGAAGCTGCAGAA |        | AGATGAGAGAACCAAGG | GGAAGTGACATAGCAGG    |        |     |
|   | 1     | GTATAAAGAGACCATCA        | ATCAGGAAGCTGCAGAA | WT     | AGATGAGAGAACCAAGG | GGAAGTGACATAGCAGG    | WT     |     |
|   | 2     | GTTAAAAGAGACCATCA        | ATCAGGAAGCTGCAGAA | WT     | AGATGAGAGAACCAAGG | GGAAGTGACATAGCAGG    | WT     |     |
|   | 3     | GTTAAAAGAGACCATCA        | ATCAGGAAGCTGCAGAA | WT     | AGATGAGAGAACCAAGG | GGAAGTGACATAGCAGG    | WT     |     |
|   | 4     | GTTAAAAGAGACCATCA        | ATCAGGAAGCTGCAGAA | WT     | AGA--             |                      | -31    |     |
|   | 5     | GGTAA--                  | --AAGCTGCAGAA     | -18    | AGATGAGAGAACCAAGG | GGAAGTGACATAGCAGG    | WT     |     |
|   | 6     | GTTAAAAGAGACCA--         | ATCAGGAAGCTGCAGAA | -3     | AGATGAGAGAACCAAGG | GGAAGTGACATAGCAGG    | WT     |     |
|   | 7     | GTTAAAAGAGACCAT--        | --CAGAA           | -14    | AGATGAGAGAACCAAGG | GGAAGTGACATAGCAGG    | WT     |     |
|   | 8     | GTTAAAAGA--              | --GAGGAAGCTGCAGAA | -10    | AGATGAGAGAACCAAGG | --AAGTGACATAGCAGG    | -2     |     |
|   | 9     | GTTAAAAGAGACC--          | ATCAGGAAGCTGCAGAA | -4     |                   | --GGGACATAGCAGG      | -36    |     |
|   | 10    | GTTAAAAGAGACCATCA        |                   | -17    | AGATGAGAGAACCAAGG | --AAGTGACATAGCAGG    | -2     |     |
|   | 11    | GTT--                    | --TAGGAAGCTGCAGAA | -16/NS | AGG--             | GGAAGTGACATAGCAGG    | NS/-14 |     |
|   | 12    | GTTAAAAGAGACCATATGTTACTA | ATCAGGAAGCTGCAGAA | NS/+7  | AGATGAGAGAACCAAGG | --AAGTGACATAGCAGG    | -2     |     |
|   | 13    | GTTAAAAGAGACCATCC        | ATCAGGAAGCTGCAGAA | NS     | AGATGAGAGAAC      |                      | -45    |     |
|   | 14    |                          | --GCTGCAGAA       | -31    | AGATGAGAGAACCAAGG | GATCCAGGGGACATAGCAGG | +4/NS  |     |
|   | 15    |                          | --AAGCTGCAGAA     | -73    | AGATGAGAGAACCAAGG | --CAGG               | -13    |     |
|   | 16    | GTTAAA--                 | --GAAGCTGCAGAA    | -15    | AGATGAGAGAACCAAG- | --TGACATAGCAGG       | -6     |     |
|   | 17    | GTTAAAAGAGACCATTAGG      | ATCAGGAAGCTGCAGAA | NS/+2  | AGATGAGAGAACCAAGG | GCGGAAGTGACATAGCAGG  | +2     |     |
|   | 18    | GTTAAAAGAGACCATCA        | --CAGAA           | -12    | AGATGAGAGAACCAAGG | GTGGAAGTGACATAGCAGG  | +2     |     |
|   | 19    | GTTAAAAGAGACCATC-        |                   |        |                   | GGAAGTGACATAGCAGG    | EX     | -1  |
|   | 20    | GTTAAAAGAGACCATCA        |                   |        |                   | GGAAGTGACATAGCAG     | EX     |     |
|   | 21    | GTTAAAAGAGACTA--         |                   |        |                   | --AGCAGG             | EX     | -14 |
|   | 22    | GTTAAAAGAGACCATCA        |                   |        |                   | GGAAGTGACATAGCAGG    | EX     |     |
|   | 23    | GTTAAAAGAGACCATCA        |                   |        |                   | --GG                 | EX     | -15 |

  

| c | gGag1 |                   |                   |        | gGag3             |                     |        |        |
|---|-------|-------------------|-------------------|--------|-------------------|---------------------|--------|--------|
|   | #     | GTATAAAGAGACCATCA | ATCAGGAAGCTGCAGAA |        | AGATGAGAGAACCAAGG | GGAAGTGACATAGCAGG   |        |        |
|   | 1     | GTTAAAAGAGACCAT-- | --GAGGAAGCTGCAGAA | -4     | AGATGAGAGAACCAAGG | GGAAGTGACATAGCAGG   | WT     |        |
|   | 2     | GTTAAAAGAGACCCA-- | ATCAGGAAGCTGCAGAA | NS/-2  | AGATGAGAGAACCAAGG | GGAAGTGACATAGCAGG   | WT     |        |
|   | 3     | GTTA--            | --GAG             | -28/NS | AGATGAGAGAACCAAGG | GGAAGTGACATAGCAGG   | WT     |        |
|   | 4     | GTTAAAAGAG--      | --GAAGCTGCAGAA    | -11    | AGATGAGAGAACCAAGG | GGAAGTGACATAGCAGG   | WT     |        |
|   | 5     | CA--              | ATCAGGAAGCTGCAGAA | NS/-15 | AGATGAGAGAACCAAGG | GGAAGTGACATAGCAGG   | WT     |        |
|   | 6     | GTTAAAAGAGACCATC- | ATCAGGAAGCTGCAGAA | -1     | AGATGAGAGAACCAAGG | GGAAGTGACATAGCAGG   | WT     |        |
|   | 7     | GTTAAAAGAGACCCA-- | ATCAGGAAGCTGCAGAA | NS/-2  | AGATGAGAGAACCAAGG | GGAAGTGACATAGCAGG   | WT     |        |
|   | 8     | GTTAAAAGAGACC--   | --GAA             | -18    | AGATGAGAGAACCAAGG | GGAAGTGACATAGCAGG   | WT     |        |
|   | 9     | G--               | --AGGAA           | -28/NS | AGATGTGAGAACCAAGG | GGAAGTGACATAGCAGG   | WT     |        |
|   | 10    |                   | --                | -36    | AGATGAGAGAACCAAGG | GGAAGTGACATAGCAGG   | WT     |        |
|   | 11    | GTTAAAAGAGACC--   | ATCAGGAAGCTGCAGAA | -4     | AGATGAGAGAACCAAGG | --AAGTGACATAGCAGG   | -1/NS  |        |
|   | 12    | GTTAAAAGAGACCC--  | -TGAGGAAGCTGCAGAA | NS/-3  | AGATGAGAGAACCAAGG | --TGACATAGCAGG      | -5     |        |
|   | 13    | GTTAAAAGGCA--     | ATCAGGAAGCTGCAGAA | -6     |                   | --ATG               | -32    |        |
|   | 14    | GTTAAAAGAGACCATC- | ATCAGGAAGCTGCAGAA | -8     | AGATGAGAGAACCAAGG | --GAGCATAGCAGG      | -5/NS  |        |
|   | 15    | GTTAAAAGAGACCAT-  | --                | -20    | AGATGAGAGAACCAAGG | AAGGAAGTGACATAGCAGG | +2     |        |
|   | 16    | GTTAAAAGA--       | --GAGGAAGCTGCAGAA | -10    | AGATGAGAGAAAC--   | --CATAGCAGG         | NS/-11 |        |
|   | 17    |                   | --                | -38    | AGATGAGAGAACCAAGG | --GAAGTGACATAGCAGG  | -1     |        |
|   | 18    | GTTAA--           | --AAGGTGCAGAA     | -18    | AGATGAGAGAACCAAGG | --AAGTGACATAGCAGG   | -2     |        |
|   | 19    | C--               | --                |        |                   | --GAGCAG            | EX     | -27/NS |
|   | 20    | GTTAAAAGAGACCATC- |                   |        |                   | --GAGCAGG           | EX     | -11/NS |
|   | 21    | GTTAAAAGAGACCATCA |                   |        |                   | GGAAGTGACATAGCAGG   | EX     |        |
|   | 22    | GTTAAAAGAGACCATCA |                   |        |                   | GGAAGTGACATAGCAGG   | EX     |        |
|   | 23    | GTTAAAAGAGACCATCA |                   |        |                   | GGAAGTGACATAGCAGG   | EX     |        |
|   | 24    | GTTAAAAGAGACCATC- |                   |        |                   | GGAAGTGACATAGCAGG   | EX     | -1     |

**Figure S1.** Sequence analysis of gGag1+gGag3 targeted HIV-rtTA DNA. SupT1 cells stably expressing Cas9+gGag1+gGag3 were infected with HIV-rtTA and cellular DNA was isolated at 7 days post-infection as described in Figure 3 (n=3; a-c). The gRNA target regions were amplified by PCR, the PCR products were TA cloned and 23-24 cloned fragments were sequenced. Sequences were aligned to the wild-type reference HIV-LAI sequence (highlighted in yellow; PAM sequence in bold) and 17 nucleotides on either side of the Cas9 cleavage sites (indicated by black arrows) are shown. Wild-type (WT; green), mutation (white) and excision (EX; blue) products are indicated (mutations in red; NS, nucleotide substitution; -n, n nucleotides deleted; +n, n nucleotides inserted).

| a HIV-LAI |                                    |                                  |        |
|-----------|------------------------------------|----------------------------------|--------|
| I         | gGag1                              |                                  |        |
| #         | GT T A A A A G A G A C C A T C A   | AT G A G G A A G C T G C A G A A |        |
| 1         | GT T A A A A G A G A C C A T C A   | AT G A G G A A G C T G C A G A A | WT     |
| 2         | GT T A A A A G A G A C C A T C A   | AT G A G G A A G C T G C A G A A | WT     |
| 3         | GT T A A A A G A G A C C A T C A   | AT G A G G A A G C T G C A G A A | WT     |
| 4         | GT T A A A A G A G A C C A T C A   | AT G A G G A A G C T G C A G A A | WT     |
| 5         | GT T A A A A G A G A C C A T C A   | AT G A G G A A G C T G C A G A A | WT     |
| 6         | GT T A A A A G A G A C C A T C A   | AT G A G G A A G C T G C A G A A | WT     |
| 7         | GT T A A A A A                     | --G A G G A A G C T G C A G A A  | -12    |
| 8         | GT T A A A A G A G A C C A T C -   | AT G A G G A A G C T G C A G A A | -1     |
| 9         | GT T A -                           | --G A G G A A G C T G C A G A A  | -57    |
| 10        | GT T A A A A G A G A C C A T C A C | CT G A G G A A G C T G C A G A A | +1/NS  |
| 11        | GT T A A A A G A G A C A G A A T   | GG G A G G A A G C T G C A G A A | NS     |
| 12        | GT T A A A A G A -                 | --G A A G C T G C A G A A        | -13    |
| 13        | GT -                               | --CT G C A G A A                 | -24    |
| 14        | GT T A A A A G A G A -             | --CT G C A G A A                 | -15    |
| 15        | GT T C C A A G A G A C C G T T -   | AT A A G G A A G C T G C A G A A | NS/-1  |
| 16        | GT T A A A A G A G A C C T C A T   | --C G A A G C T G C A G A A      | NS/-4  |
| 17        | GT T A A -                         | AT G A G G A A G C T G C A G A A | -12    |
| 18        | GT T A A A A G A G A C C A T C -   | --G C A G A A                    | -11    |
| 19        | GT T A -                           | --AG A G                         | -26/NS |
| 20        | GT T A A A A G A G A C C T T C T   | AT G A G G A A G C T G C A G A A | NS     |
| 21        | GT T A A A A -                     | --G A G G A A G C T G C A G A A  | -12    |
| 22        | GT T A A A A G A G A C C -         | AT G A G G A A G C T G C A G A A | -14    |
| 23        | GT T A A A A G -                   | --                               | -44    |

| d HIV-rtTA |                                        |                                   |     |
|------------|----------------------------------------|-----------------------------------|-----|
| I          | gGag1                                  |                                   |     |
| #          | GT T A A A A G A G A C C A T C A       | AT G A G G A A G C T G C A G A A  |     |
| 1          | GT T A A A A G A G A C C A T C A       | AT G A G G A A G C T G C A G A A  | WT  |
| 2          | GT T A A A A G A G A C C A T C A       | AT G A G G A A G C T G C A G A A  | WT  |
| 3          | GT T A A A A G A G A C C A T C A       | AT G A G G A A G C T G C A G A A  | WT  |
| 4          | GT T A A A A G A G A C C A T C A       | AT G A G G A A G C T G C A G A A  | WT  |
| 5          | GT T A A A A G A G A C C A T C A       | AT G A G G A A G C T G C A G A A  | WT  |
| 6          | GT T A A A A G A G A C C A T C A       | AT G A G G A A G C T G C A G A A  | WT  |
| 7          | GT T A A A A G A G A C C A T C A       | AT G A G G A A G C T G C A G A A  | WT  |
| 8          | GT T A G A A G A G A C C A T C A       | AT G A G G A A G C T G C A G A A  | WT  |
| 9          | GT T A A A A G A G A C C A T C A       | AT G A G G A A G C T G C A G A A  | WT  |
| 10         | GT T A A A A G A G A C C A T C A       | AT G A G G A A G C T G C A G A A  | WT  |
| 11         | GT T A A A A G A G A C C A T C A       | AT G A G G A A G C T G C A G A A  | WT  |
| 12         | GT T A A A A G A G A C C A T C A       | AT G A G G A A G C T G C A G A A  | WT  |
| 13         | GT T A A A A G A G A C C A T C A       | AT G A G G A A G C T G C A G A A  | WT  |
| 14         | GT T A A A A G A G A C C A T C A       | AT G A G G A A G C T G C A G A A  | WT  |
| 15         | GT T A A A A G A G A C C A T C A       | AT G A G G A A G C T G C A G A A  | WT  |
| 16         | GT T A A A A G A G A C C A T C A       | AT G A G G A A G C T G C A G A A  | WT  |
| 17         | GT T A A A A G A G A C C A T C A       | AT G A G G A A G C T G C A G A A  | WT  |
| 18         | -                                      | -                                 | -67 |
| 19         | -                                      | -G C T G C A G A A                | -26 |
| 20         | GT T A A A A G A G A C C A T C -       | AT G A G G A A G C T G C A G A A  | -1  |
| 21         | GT T A A A A G A G A C C A T C A A C C | AT G A G G A A G C T G C A G A A  | +3  |
| 22         | GT T A A A A G A G -                   | -                                 | -34 |
| 23         | GT T A A A A G A G A C C A T C C       | AT G A G G A A G C T G C A G G A  | NS  |
| 24         | GT T A A A A G A G A C C A T C A       | G T G A G G A A G C T G C A G A A | NS  |

| b  |                                      |                                  |       |
|----|--------------------------------------|----------------------------------|-------|
| II | gGag1                                |                                  |       |
| #  | GT T A A A A G A G A C C A T C A     | AT G A G G A A G C T G C A G A A |       |
| 1  | GT T A A A A G A G A C C A T C A     | AT G A G G A A G C T G C G G A A | WT    |
| 2  | GT T A A A A G A G A C C A T C -     | AT G A G G A A G C T G C A G A A | -1    |
| 3  | GT T A A A A G A G A C C -           | AT G A G G A A G C T G C A G A A | -4    |
| 4  | GT T A A A A G A G A C -             | --CT G C A G A A                 | -14   |
| 5  | GT T A A A -                         | --A G G A A G C T G C A G A A    | -14   |
| 6  | GT T A A A A G A G A C C A T C -     | AT G A G G A A G C T G C A G T A | -1    |
| 7  | GT T A A A A G A G A C C A T C A G A | AT G A G G A A G C T G C A G A A | +2    |
| 8  | GT T A A A A G A G A C C A T C -     | AT G A G G A A G C T G C A G A A | -1    |
| 9  | GT T A A A A G A G A C C -           | AT G A G G A A G C T G C A G A A | -4    |
| 10 | GT T A A A A G A G A C C A T C A     | --C C A G C T G C A G A A        | -5/NS |
| 11 | -                                    | --                               | -40   |
| 12 | GT T A A A A G A G A C C A T C A A   | AT G A G G A A G C T G C A G A A | +1    |
| 13 | -                                    | --G G A A G C T G C A G A A      | -22   |
| 14 | GT T A A A A G A G A C A -           | AT G A G G A A G C T G C A G A A | -4    |
| 15 | GT T A A A A G A G A C A -           | AT G A G G A A G C T G C A G A A | -4    |
| 16 | GT T A A A A G A G A C C A T C A A   | AT G A G G A A G C T G C A G A A | +1    |

| e  |                                    |                                  |       |
|----|------------------------------------|----------------------------------|-------|
| II | gGag1                              |                                  |       |
| #  | GT T A A A A G A G A C C A T C A   | AT G A G G A A G C T G C A G A A |       |
| 1  | GT T A A A A G A G A C C A T C A   | AT G A G G A A G C T G C A G A A | WT    |
| 2  | GT T A A A A G A G A C C A T C A   | AT G A G G A A G C T G C A G A A | WT    |
| 3  | GT T A A A A G -                   | --AG C T G C A G A A             | -16   |
| 4  | GT T A A A A G A G A C C A T C -   | --G A G C T G C A G A A          | -7/NS |
| 5  | GT T A A A A G A G A C C A T -     | AT G A G G A A G C T G C A G A A | -2    |
| 6  | GT T A A A A G A G A C C -         | AT G A G G A A G C T G C A G A A | -4    |
| 7  | GT T A A A A G A G A C C A T C A A | AT G A G G A A G C T G C A G A A | +1    |
| 8  | GT T A A A A G A G A C C -         | AT G A G G A A G C T G C A G A A | -4    |
| 9  | GT T A A A A G A G A C C A T C -   | AT G A G G A A G C T G C A G A A | -1    |
| 10 | GT T A A A A G A G A C C A -       | --G C A G A A                    | -14   |
| 11 | G -                                | --                               | -42   |
| 12 | GT T A A A A G A G A C C A T C A A | AT G A G G A A G C T G C A G A A | +1    |
| 13 | GT T A A A A G -                   | --AG C T G C A G A A             | -16   |

| c   |                                           |                                  |       |
|-----|-------------------------------------------|----------------------------------|-------|
| III | gGag1                                     |                                  |       |
| #   | GT T A A A A G A G A C C A T C A          | AT G A G G A A G C T G C A G A A |       |
| 1   | GT T A A A A G A G A C C A T C A          | AT G A G G A A G C T G C A G A A | WT    |
| 2   | GT T A A A A G A G A C C A T C A          | AT G A G G A A G C T G C A G A A | WT    |
| 3   | GT T A A A A G A G A C C A T C A          | AT G A G G A A G C T G C A G A A | WT    |
| 4   | GT T A A A A G A G A C C A A -            | AT G A G G A A G C T G C A G A A | NS/-2 |
| 5   | GT T A A A A G A G A C C A -              | AT G A G G A A G C T G C A G A A | -3    |
| 6   | G C T A A A A G A G A C C A T C A C C C T | AT G A G G A A G C T G C A G A A | +4    |
| 7   | GT T A A A A G A G A C C A T C T T        | AT G A G G A A G C T G C A G A A | NS/+1 |
| 8   | GT T A -                                  | --C A G A A                      | -19   |
| 9   | GT T A A A A G A G A C A -                | AT G A G G A A G C T G C A G A A | -4    |
| 10  | -                                         | --                               | -79   |
| 11  | GT T A A A A G A G A C -                  | --CT G C A G A A                 | -14   |
| 12  | GT T A A A A G A G A C C A T C -          | AT G A G G A A G C T G C A G A A | -1    |
| 13  | GT T A A A A G A G A C C A T C A A        | AT G A G G A A G C T G C A G A A | +1    |

| f   |                                    |                                  |         |
|-----|------------------------------------|----------------------------------|---------|
| III | gGag1                              |                                  |         |
| #   | GT T A A A A G A G A C C A T C A   | AT G A G G A A G C T G C A G A A |         |
| 1   | GT T A A A A G A G A C C A T C A   | AT G A G G A A G C T G C A G A A | WT      |
| 2   | GT T A A A A G A G A C C A T C A   | AT G A G G A A G C T G C A G A A | WT      |
| 3   | GT T A A A A G A G A C C A T C A   | AT G A G G A A G C T G C A G A A | WT      |
| 4   | GT T A A A A G A G A C C A T C A   | AT G A G G A A G C T G C A G A A | WT      |
| 5   | GT T A A A A G A G A C C A T C -   | AT G A G G A A G C T G C A G A A | -1      |
| 6   | GT T A A A A G A G A C C A T C A A | AT G A G G A A G C T G C A G A A | +1      |
| 7   | GT T A A A A G A G A C C A T C A A | AT G A G G A A G C T G C A G A A | +1      |
| 8   | GT T A A A A G A G A C C A T C A C | AT G A G G A A G C T G C A G A A | +1      |
| 9   | GT T A A A A G A G A C C A T C -   | AT G G G A A G C T G C A G A A   | -1/NS   |
| 10  | GT T A A A A G A G A C C A T C A A | AT G A G G A A G C T G C A G A A | +1      |
| 11  | GT T A A A A G A G A C C A T C A A | AT G A G G A A G C T G C A G A A | +1      |
| 12  | GT T A A A A G A G A C C -         | AT G A G G A A G C T G C A G A A | -4      |
| 13  | GT T A A A A G A G A C C A T -     | CT G A G G A A G C T G C A G A A | -2/NS   |
| 14  | -                                  | -                                | -149    |
| 15  | -                                  | -                                | -76     |
| 16  | -                                  | --G A A G T G C A G A A          | -111/NS |

**Figure S2.** Sequence analysis of gGag1+gTatRev targeted proviral DNA. SupT1 cells stably expressing Cas9+gGag1+gTatRev were infected with HIV-LAI (n=3; a-c) or HIV-rtTA (n=3; d-f) and cellular DNA was isolated at 7 days post-infection as described in Figure 5. The gGag1 target region was amplified through PCR, PCR products were TA cloned and 13-24 clones were sequenced. Sequences are shown as described in Supplementary Figure S1.

| a HIV-LAI |                   |                     | d HIV-rtTA |                  |                     |
|-----------|-------------------|---------------------|------------|------------------|---------------------|
| I         | gGag1             |                     | I          | gGag1            |                     |
| #         | GTTAAAGAGACCATCA  | ATGAGGAAGCTGCAGAA   | #          | GTTAAAGAGACCATCA | ATGAGGAAGCTGCAGAA   |
| 1         | GTTAAAGAGACCATCA  | ATGAGGAAGCTGCAGAA   | 1          | GTTAAAGAGACCATCA | ATGAGGAAGCTGCAGAA   |
| 2         | GTTAAAGAGACCATCA  | ATGAGGAAGCTGCAGAA   | 2          | GTTAAAGAGACCATCA | ATGAGGAAGCTGCAGAA   |
| 3         | GTTAAAGAGACCATCA  | ATGAGGAAGCTGCAGAA   | 3          | GTTAAAGAGACCATCA | ATGAGGAAGCTGCAGAA   |
| 4         | GTTAAAGAGACCATCA  | ATGAGGAAGCTGCAGAA   | 4          | GTTAAAGAGACCATCA | ATGAGGAAGCTGCAGAA   |
| 5         | GTTAAAGAGACCATCA  | ATGAGGAAGCTGCAGAA   | 5          | GTTAAAGAGACCATCA | ATGAGGAAGCTGCAGAA   |
| 6         | GTTAAAGAGACCATCA  | ATGAGGAAGCTGCAGAA   | 6          | GTTAAAGAGACCATCA | ATGAGGAAGCTGCAGAA   |
| 7         | GTTAAAGAGACCATCA  | ATGAGGAAGCTGCAGAA   | 7          | GTTAAAGAGACCATCA | ATGAGGAAGCTGCAGAA   |
| 8         | GTTAAAGAGACCATCA  | ATGAGGAAGCTGCAGAA   | 8          | GTTAAAGAGACCATCA | ATGAGGAAGCTGCAGAA   |
| 9         | GTTAAAGAGACCATCA  | -----GAAGCTGCAGAA   | 9          | GTTAAAGAGACCATCA | ATGAGGAAGCTGCAGAA   |
| 10        | -----GAAGCTGCAGAA | -----GAAGCTGCAGAA   | 10         | GTTAAAGAGAC      | -----AAGCTGCAGAA    |
| 11        | GTTAAAGAGAC       | -----TAAGCTGCAGAA   | 11         | GTTAAAGAGACCATCA | ATGAGGAAGCTGCAGAA   |
| 12        | GTTAA             | -----AGGAAGCTGCAGAA | 12         | GTTAAAGAGACCATCA | ATGAGGAAGCTGCAGAA   |
| 13        | GTTAAAGAGACA      | ATGAGGAAGCTGCAGAA   | 13         | GTTAAAGAGACCATCA | ATGAGGAAGCTGCAGAA   |
| 14        | -----GAAGCTGCAGAA | -----GAAGCTGCAGAA   | 14         | GTTAAAGAGAC      | -----CTGCAGAA       |
| 15        | GTTAAAGAGACCATCA  | ATGAGGAAGCTGCAGAA   | 15         | GTTAAAGAG        | -----TGCTGCAGAA     |
| 16        | GTTA              | -----GCAGAA         | 16         | GTTAA            | -----ACGGCTGCAGAA   |
| 17        | GTTAAAGAGACC      | ATGAGGAAGCTGCAGAA   | 17         | GTTAAAGAGACC     | CTGAGGAAGCTGCAGAA   |
| 18        | GTTAAAGAGACCATCA  | ATGAGGAAGCTGCAGAA   | 18         | GTTAAAGAGACCATC  | ATGAGGAAGCTGCAGAA   |
| 19        | GTTAAAGAGACCAT    | -----AGGAAGCTGCAGAA | 19         | GTTAA            | -----GAGGAGCTGCAGAA |
| 20        | GTTAAAGAGACCATCA  | ATGAGGAAGCTGCAGAA   | 20         | GTTAAAGAGAC      | ATGAGGAAGCTGCAGAA   |
| 21        | GTTAAAGAGACC      | -----GGAAGCTGCAGAA  | 21         | -----GCGCAGAA    | -----GCGCAGAA       |
| 22        | GTTAAAGAGACC      | ATGAGGAAGCTGCAGAA   |            |                  |                     |
| 23        | GTTAAAGAGAC       | ATGAGGAAGCTGCAGAA   |            |                  |                     |

  

| b  |                  |                      | e  |                  |                      |
|----|------------------|----------------------|----|------------------|----------------------|
| II | gGag1            |                      | II | gGag1            |                      |
| #  | GTTAAAGAGACCATCA | ATGAGGAAGCTGCAGAA    | #  | GTTAAAGAGACCATCA | ATGAGGAAGCTGCAGAA    |
| 1  | GTTAAAGAGACCATCA | ATGAGGAAGCTGCAGAA    | 1  | GTTAAAGAGACCATCA | ATGAGGAAGCTGCAGAA    |
| 2  | GTTAAAGAGACCATCA | ATGAGGAAGCTGCAGAA    | 2  | GTTAAAGAGACCATCA | ATGAGGAAGCTGCAGAA    |
| 3  | GTTAAAGAGACCATCA | ATGAGGAAGCTGCAGAA    | 3  | GTTAAAGAGACCATCA | ATGAGGAAGCTGCAGAA    |
| 4  | GTTAAAGAGACCATCA | -----CAGGAAGCTGCAGAA | 4  | GTTAAGA          | ATGAGGAAGCTGCAGAA    |
| 5  | GTTAAAGAGACCA    | ATGAGGAAGCTGCAGAA    | 5  | -----            | -----                |
| 6  | GTTAAAGAGAC      | ATGAGGAAGCTGCAGAA    | 6  | GTTAAAGAGACC     | ATGAGGAAGCTGCAGAA    |
| 7  | GTTAAAGAGACC     | ATGAGGAAGCTGCAGAA    | 7  | G                | -----GGAAGCTGCAGAA   |
| 8  | GTTAAAGAGACCATC  | ATGAGGAAGCTGCAGAA    | 8  | GTTAAAGA         | -----GAGGAAGCTGCAGAA |
| 9  | GTTAAAGAGACCATCA | ATGAGGAAGCTGCAGAA    | 9  | GTTAAAGAGACCATCA | ATGAGGAAGCTGCAGAA    |
| 10 | GTTAAAGAGACCATCA | -----AGCAGAA         | 10 | GTTAA            | -----AGGAAGCTGCAGAA  |
| 11 | GTTAAAGAGACCATCA | -----TAAGCTGCAGAA    | 11 | GTTAAAGAGACCATC  | ATGAGGAAGCTGCAGAA    |
| 12 | GTTAAAGAGACCATCA | ATGAGGAAGCTGCAGAA    | 12 | GTTAAAGAGACCATCA | ATGAGGAAGCTGCAGAA    |
| 13 | GTTAAAGAGACCATCA | ATGAGGAAGCTGCAGAA    | 13 | -----            | -----                |
| 14 | GTTAA            | -----AGGAAGCTGCAGAA  | 14 | GTTAAAGAGACCATC  | ATGAGGAAGCTGCAGAA    |
| 15 | GTTAAAGAGACCATC  | ATGAGGAAGCTGCAGAA    | 15 | GTTAAAGAGACCATCA | ATGAGGAAGCTGCAGAA    |
| 16 | GTTAAAGAGACCATCA | ATGAGGAAGCTGCAGAA    | 16 | GTTAA            | -----AGGAAGCTGCAGAA  |

  

| c   |                     |                     | f   |                  |                     |
|-----|---------------------|---------------------|-----|------------------|---------------------|
| III | gGag1               |                     | III | gGag1            |                     |
| #   | GTTAAAGAGACCATCA    | ATGAGGAAGCTGCAGAA   | #   | GTTAAAGAGACCATCA | ATGAGGAAGCTGCAGAA   |
| 1   | GTTAAAGAGACCATC     | ATGAGGAAGCTGCAGAA   | 1   | GTTAAAGAGACCATCA | ATGAGGAAGCTGCAGAA   |
| 2   | GTTAAAGAGAC         | -----TCAGCTGCAGAA   | 2   | GTTAAAGAGACCATCA | ATGAGGAAGCTGCAGAA   |
| 3   | GTTAAAGAGACCATCCATT | CTGAGGAAGCTGCAGAA   | 3   | GTTAAAGAGACCATCA | ATGAGGAAGCTGCAGAA   |
| 4   | GTTAAAGAGACCATC     | -----AGGAAGCTGCAGAA | 4   | GTTAAAGAGACCATCA | ATGAGGAAGCTGCAGAA   |
| 5   | G                   | -----               | 5   | GTTAAAGAGACCATCA | ATGAGGAAGCTGCAGAA   |
| 6   | GTTAAAGA            | ATGAGGAAGCTGCAGAA   | 6   | GTTAA            | -----AGGAAGCTGCAGAA |
| 7   | GTTAAAGAGACCATCAGG  | ATGAGGAAGCTGCAGAA   | 7   | GTTAAAGAGACCATCA | ATGAGGAAGCTGCAGAA   |
| 8   | GTTAAAGAGACC        | ATGAGGAAGCTGCAGAA   | 8   | GTTAAAGAGAC      | -----AGGAAGCTGCAGAA |
| 9   | -----               | ATGAGGAAGCTGCAGAA   | 9   | GTTAA            | -----AGGAAGCTGCAGAA |
| 10  | GTTA                | -----CGACAGAA       | 10  | GTTAAAGAGACCATCA | ATGAGGAAGCTGCAGAA   |
| 11  | GTTAAAGAGACCA       | -----GAGCTGCAGAA    | 11  | GTTAAAGAGACCAT   | -----               |
| 12  | GTT                 | -----CTGCAGAA       | 12  | GTTAA            | -----AGGAAGCTGCAGAA |
| 13  | GTTAAAGAGAGA        | -----AGCTGCAGAA     | 13  | GTTAAAGAGACCA    | -----AGGAAGCTGCAGAA |
| 14  | -----               | -----               | 14  | GTTAAAGAGAGA     | AGGAGGAAGCTGCAGAA   |
| 15  | -----               | ATGAGGAAGCTGCAGAA   | 15  | GTTAAAGAGACCATCA | ATGAGGAAGCTGCAGAA   |

**Figure S3.** Sequence analysis of gGag1+gEnv2 targeted proviral DNA. SupT1 cells stably expressing Cas9+gGag1+gEnv2 were infected with HIV-LAI (n=3; **A-C**) or HIV-rtTA (n=3; **D-F**) and cellular DNA was isolated at 7 days post-infection (as described in Figure 4). The gGag1 target region was amplified through PCR, PCR products were TA cloned and 15-23 clones were sequenced. Sequences are shown as described in Supplementary Figure S1.

**Table S1.** Primers and probe used for PCR and qPCR analysis

| name                | sequence                        |
|---------------------|---------------------------------|
| gGag1-forward (a)   | ACCTAGAACTTTAAATGCATGG          |
| gGag3-reverse (b)   | CGGTCTACATAGTCTCTAAAGG          |
| gTatRev-forward (c) | GAGCCAGTAGATCCTAGAC             |
| gTatRev-reverse (d) | CTACTACTAATGCTGCTATTGC          |
| gEnv2-forward (c)   | GCAAAGAGAAGAGTGGTG              |
| gEnv2-reverse (d)   | AGCCAGGATTCTTGCC                |
| gGag1-probe         | CCCATGTTTTTCAGCATTATCAGAAGGAGCC |

**Table S2.** Selected gRNAs targeting HIV-1

| Name    | Target Sequence + PAM (underlined) | Orientation |
|---------|------------------------------------|-------------|
| gGag1   | GTAAAAAGAGACCATCAATG <u>AGG</u>    | Sense       |
| gGag3   | <u>CCA</u> AGGGGAAGTGACATAGCAGG    | Antisense   |
| gTatRev | <u>CCT</u> ATGGCAGGAAGAAGCGGAGA    | Antisense   |
| gEnv2   | GGAGCAGCAGGAAGCACTAT <u>GGG</u>    | Sense       |
